# Supplementary material for: SNP-by-CpG Site Interactions in ABCA7 Are Associated with Cognition in Older African Americans
Source: MDPI journal article supplement (doi:10.3390/genes13112150), 2022-11-18
Supplement: s1 [file s1]

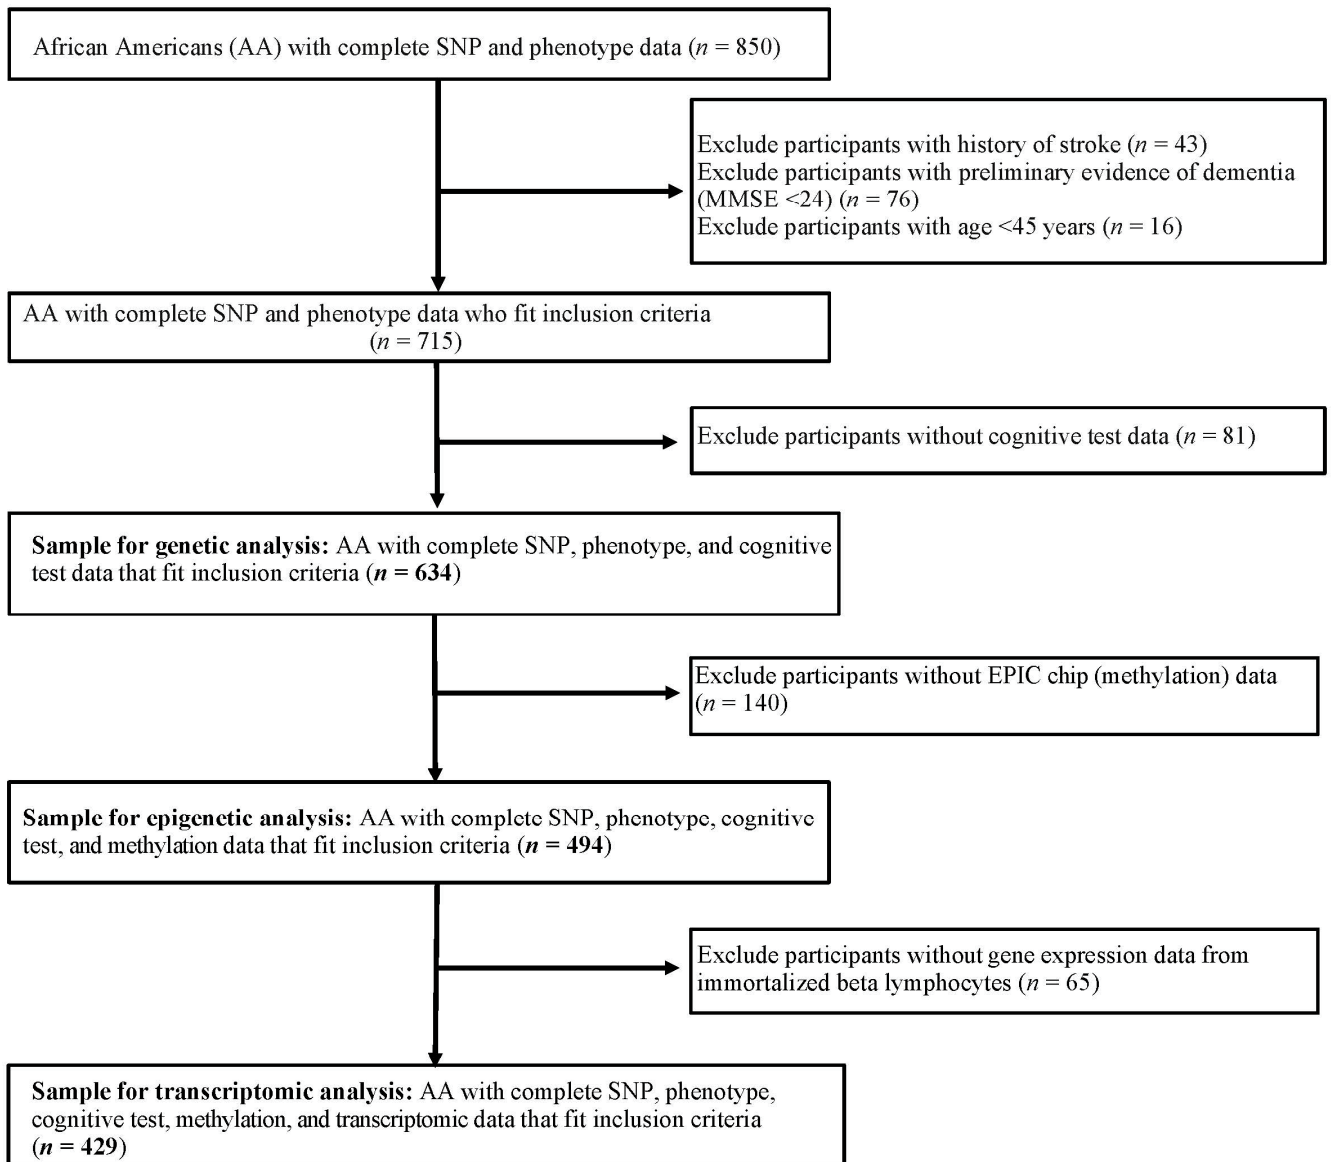

Figure S1: Flow diagram illustrating sample sizes for genetic ( $n = 634$ ), epigenetic ( $n = 494$ ), and transcriptomic ( $n = 429$ ) analyses in GENOA AA.

|                                                                                                                                                                                                                                                                                                                                                                                                                                                 |
|-------------------------------------------------------------------------------------------------------------------------------------------------------------------------------------------------------------------------------------------------------------------------------------------------------------------------------------------------------------------------------------------------------------------------------------------------|
| <p><b><u>Genetic associations</u></b></p> <p><b>Model 1:</b> General cognitive function ~ SNP + age at cognition measurement + sex + PC1-4+ familial relatedness (random effect)</p> <p><b>Model 2:</b> Model 1 + educational attainment</p> <p><b>Model 3:</b> Model 2 + <i>APOE</i> <math>\epsilon</math>2 + <i>APOE</i> <math>\epsilon</math>4</p>                                                                                           |
| <p><b><u>Epigenetic associations</u></b></p> <p><b>Model 1:</b> General cognitive function ~ CpG site + sex + age at cognition measurement + age difference between methylation and cognition measurements + smoking status + PC1-4 + familial relatedness (random effect)</p> <p><b>Model 2:</b> Model 1 + educational attainment</p> <p><b>Model 3:</b> Model 2 + <i>APOE</i> <math>\epsilon</math>2 + <i>APOE</i> <math>\epsilon</math>4</p> |
| <p><b><u>Genetic-epigenetic interaction associations</u></b></p> <p><b>Model 4:</b> General cognitive function ~ SNP + CpG + SNP*CpG + age at cognition measurement + age difference between methylation and cognition measurements + sex + educational attainment + <i>APOE</i> <math>\epsilon</math>2 + <i>APOE</i> <math>\epsilon</math>4 + smoking status + PC1-4 + familial relatedness (random effect)</p>                                |

Figure S2: Models used to assess genetic, epigenetic and genetic-epigenetic interaction associations with general cognitive function.



**Table S1. Pearson's correlations among the six cognitive measures ( $n = 634$ )**

|                            | RAVLT    | DSST     | COWA-FAS | SCWT     | TMTA     | General<br>cognitive<br>function |
|----------------------------|----------|----------|----------|----------|----------|----------------------------------|
| RAVLT                      | 1.000    |          |          |          |          |                                  |
| DSST                       | 0.365*** | 1.000    |          |          |          |                                  |
| COWA-FAS                   | 0.248*** | 0.516*** | 1.000    |          |          |                                  |
| SCWT                       | 0.251*** | 0.516*** | 0.336*** | 1.000    |          |                                  |
| TMTA                       | 0.241*** | 0.663*** | 0.419*** | 0.432*** | 1.000    |                                  |
| General cognitive function | 0.522*** | 0.874*** | 0.698*** | 0.704*** | 0.791*** | 1.000                            |

Abbreviations: RAVLT, Rey Auditory Verbal Learning Test; DSST, Digit Symbol Substitution Task; COWA-FAS, Controlled Oral Word Association Test; SCWT, Stroop Color-Word Test; TMTA, Trail Making Test A

\*\*\* $p < 0.001$

**Table S2. Pearson's correlations among the five sentinel *ABCA7* SNPs (*n* = 634)**

|             | rs3764647 | rs3764650 | rs115550680 | rs3752246 | rs4147929 |
|-------------|-----------|-----------|-------------|-----------|-----------|
| rs3764647   | 1.000     |           |             |           |           |
| rs3764650   | 0.843***  | 1.000     |             |           |           |
| rs115550680 | -0.117**  | -0.141*** | 1.000       |           |           |
| rs3752246   | -0.139*** | -0.004    | -0.101*     | 1.000     |           |
| rs4147929   | -0.140*** | -0.026    | -0.110**    | 0.956***  | 1.000     |

\*  $p < 0.05$ , \*\*  $p < 0.01$ , \*\*\*  $p < 0.001$

**Table S3. Association between *ABCA7* sentinel SNPs and general cognitive function ( $n = 634$ )**

| PMID <sup>a</sup> | Ancestry <sup>b</sup> | SNP                      | Chr | Position | Risk Allele | RAF   | Model 1              |            | Model 2              |            | Model 3              |            |
|-------------------|-----------------------|--------------------------|-----|----------|-------------|-------|----------------------|------------|----------------------|------------|----------------------|------------|
|                   |                       |                          |     |          |             |       | $\beta_{\text{SNP}}$ | $p$ -value | $\beta_{\text{SNP}}$ | $p$ -value | $\beta_{\text{SNP}}$ | $p$ -value |
| 28480329          | AA                    | rs3764647                | 19  | 1044712  | G           | 0.203 | -0.04                | 0.518      | -0.02                | 0.786      | -0.01                | 0.823      |
| 21460840          | EA                    | rs3764650                | 19  | 1046520  | G           | 0.254 | -0.03                | 0.598      | -0.02                | 0.768      | -0.02                | 0.716      |
| 23571587          | AA                    | rs115550680              | 19  | 1050420  | G           | 0.060 | -0.03                | 0.748      | -0.01                | 0.928      | -0.01                | 0.884      |
| 21460841          | EA                    | rs3752246                | 19  | 1056492  | G           | 0.042 | 0.21                 | 0.088      | 0.15                 | 0.180      | 0.15                 | 0.186      |
| 24162737          | EA                    | rs4147929                | 19  | 1063443  | A           | 0.049 | 0.21                 | 0.075      | 0.12                 | 0.243      | 0.12                 | 0.241      |
| -                 | -                     | <i>APOE</i> $\epsilon 2$ | 19  | 45411941 | T           | 0.122 | 0.07                 | 0.317      | 0.11                 | 0.087      | -                    | -          |
| -                 | -                     | <i>APOE</i> $\epsilon 4$ | 19  | 45412079 | C           | 0.226 | -0.11                | 0.046*     | -0.12                | 0.022*     | -                    | -          |

Abbreviations: PMID, Pubmed ID; AA, African American; EA, European American; Chr, chromosome; RAF, risk allele frequency in GENOA

a. Pubmed ID numbers for studies that identified sentinel SNPs in the *ABCA7* region in association with Alzheimer's disease.

b. Ancestry of cohorts in which significant associations were identified between sentinel SNPs in the *ABCA7* region and Alzheimer's disease

Model 1: General cognitive function  $\sim$  SNP + age at cognition measurement + sex + PC1-4 + familial relatedness (random effect)

Model 2: Model 1 + educational attainment

Model 3: Model 2 + *APOE*  $\epsilon 2$  + *APOE*  $\epsilon 4$

\* $p < 0.05$ ; no associations were significant after Bonferroni correction at  $\alpha = 0.05/5 = 0.01$ .

**Table S4. Association of CpGs in the *ABCA7* region and general cognitive function ( $p < 0.05$ ;  $n = 494$ )**

| CpG site   | Position | Site Type        | Relation to CpG Island | Model 1              |                  | Model 2              |                  | Model 3              |                  |
|------------|----------|------------------|------------------------|----------------------|------------------|----------------------|------------------|----------------------|------------------|
|            |          |                  |                        | $\beta_{\text{CpG}}$ | $p\text{-value}$ | $\beta_{\text{CpG}}$ | $p\text{-value}$ | $\beta_{\text{CpG}}$ | $p\text{-value}$ |
| cg22271697 | 1042537  | Gene Body        | North Shelf            | 0.08                 | 0.009*           | 0.07                 | 0.007*           | 0.08                 | 0.004*           |
| cg00874873 | 1051161  | Gene Body        | CG Island              | 0.12                 | 0.074            | 0.13                 | 0.025*           | 0.12                 | 0.034*           |
| cg11714200 | 1065689  | Promoter         | North Shore            | 0.06                 | 0.101            | 0.08                 | 0.030*           | 0.07                 | 0.037*           |
| cg26264438 | 1039942  | Promoter         | CG Island              | 0.53                 | 0.236            | 0.84                 | 0.039*           | 0.83                 | 0.041*           |
| cg12082025 | 1064219  | Gene Body        | CG Island              | 0.05                 | 0.394            | 0.11                 | 0.047*           | 0.11                 | 0.042*           |
| cg18644543 | 1067356  | 1st Exon; 5' UTR | CG Island              | -0.51                | 0.031*           | -0.33                | 0.132            | -0.34                | 0.118            |

Model 1: General cognitive function ~ CpG site + sex + age at cognition measurement + age difference between methylation and cognition measurements + smoking status+ PC1-4 + familial relatedness (random effect)

Model 2: Model 1 + educational attainment

Model 3: Model 2 + *APOE*  $\epsilon$ 2 + *APOE*  $\epsilon$ 4

\* $p < 0.05$ ; No associations are significant at FDR  $q < 0.1$

**Table S5. Interaction between *ABCA7* sentinel SNPs and CpG sites on general cognitive function ( $p < 0.05$ ;  $n = 494$ )**

| SNP * CpG site Interaction | CpG position | Main effects          |            |                       |                         | Interaction                  |                          |
|----------------------------|--------------|-----------------------|------------|-----------------------|-------------------------|------------------------------|--------------------------|
|                            |              | $\beta_{\text{SNP}}$  | $p$ -value | $\beta_{\text{CpG}}$  | $p$ -value              | $\beta_{\text{interaction}}$ | $p$ -value               |
| rs3764647 * cg00135882     | 1065783      | -0.01                 | 0.875      | 0.24                  | 0.086                   | -0.80                        | $1.46 \times 10^{-4}$ ** |
| rs115550680 * cg06169110   | 1046615      | -0.23                 | 0.045*     | 0.06                  | 0.143                   | -0.38                        | $2.18 \times 10^{-4}$ ** |
| rs115550680 * cg17316918   | 1056930      | -0.05                 | 0.661      | -0.06                 | 0.164                   | 0.41                         | $4.84 \times 10^{-4}$ ** |
| rs3764647 * cg22271697     | 1042537      | -0.07                 | 0.319      | 0.16                  | $7.23 \times 10^{-6}$ * | -0.18                        | $5.77 \times 10^{-4}$ ** |
| rs115550680 * cg05372495   | 1063625      | -0.04                 | 0.707      | $4.92 \times 10^{-3}$ | 0.837                   | 0.17                         | 0.008*                   |
| rs115550680 * cg02913166   | 1041178      | -0.10                 | 0.329      | -0.02                 | 0.244                   | 0.17                         | 0.010*                   |
| rs115550680 * cg09467711   | 1037732      | -0.26                 | 0.049*     | -0.01                 | 0.632                   | 0.10                         | 0.011*                   |
| rs115550680 * cg12817436   | 1068561      | -0.01                 | 0.961      | -0.02                 | 0.376                   | 0.20                         | 0.011*                   |
| rs115550680 * cg07726048   | 1039944      | -0.03                 | 0.799      | 0.30                  | 0.031*                  | -1.02                        | 0.012*                   |
| rs115550680 * cg07690733   | 1066986      | -0.11                 | 0.301      | -0.14                 | 0.60                    | 2.27                         | 0.014*                   |
| rs115550680 * cg07325521   | 1040062      | -0.02                 | 0.872      | -0.12                 | 0.627                   | -1.50                        | 0.015*                   |
| rs3764647 * cg09467711     | 1037732      | -0.07                 | 0.315      | 0.03                  | 0.109                   | -0.07                        | 0.017*                   |
| rs3752246 * cg06169110     | 1046615      | $4.94 \times 10^{-3}$ | 0.967      | -0.02                 | 0.597                   | 0.24                         | 0.033*                   |

Model 4: General cognitive function ~ SNP + CpG + SNP\*CpG + age at cognition measurement + age difference between methylation and cognition measurements + sex + educational attainment + *APOE*  $\epsilon 2$  + *APOE*  $\epsilon 4$  + smoking status + PC1-4 + familial relatedness (random effect)

\*  $p < 0.05$ ; \*\* FDR  $q < 0.1$



**Table S6. Pearson's correlations among *ABCA7* CpG sites<sup>a</sup> (*n* = 494)**

|            | cg00135882 | cg22271697 | cg06169110 | cg17316918 | cg00874873 | cg11714200 | cg26264438 | cg12082025 | cg18644543 |
|------------|------------|------------|------------|------------|------------|------------|------------|------------|------------|
| cg00135882 | 1.000      |            |            |            |            |            |            |            |            |
| cg22271697 | 0.243***   | 1.000      |            |            |            |            |            |            |            |
| cg06169110 | 0.273***   | 0.085      | 1.000      |            |            |            |            |            |            |
| cg17316918 | 0.114*     | 0.152***   | -0.051     | 1.000      |            |            |            |            |            |
| cg00874873 | 0.056      | 0.166***   | 0.037      | 0.216***   | 1.000      |            |            |            |            |
| cg11714200 | 0.128**    | 0.173***   | -0.039     | 0.213***   | 0.139**    | 1.000      |            |            |            |
| cg26264438 | -0.291***  | -0.119**   | -0.105*    | -0.259***  | -0.091*    | -0.104*    | 1.000      |            |            |
| cg12082025 | 0.400***   | 0.121**    | 0.217***   | 0.151***   | 0.043      | 0.070      | -0.223***  | 1.000      |            |
| cg18644543 | -0.220***  | -0.130**   | 0.041      | -0.380***  | -0.235***  | -0.152***  | 0.407***   | -0.125**   | 1.000      |

a. CpG sites in this correlation matrix were chosen from Tables 2 and S4. Cg00135882, cg22271697, cg06169110 and cg17316918 are significant CpG sites in the SNP-by-CpG interactions on general cognitive function (FDR  $q < 0.1$ ; Table 2). Cg22271697, cg00874873, cg11714200, cg26264438, cg12082025 and cg18644543 are nominally associated with general cognitive function ( $p < 0.05$ ; Table S4).

\*  $p < 0.05$ , \*\*  $p < 0.01$ , \*\*\*  $p < 0.001$

**Table S7. Estimated effect of CpG site on general cognitive function for given *ABCA7* SNP genotype group, after excluding outlying values for CpG sites<sup>a</sup>**

| SNP         | CpG site   | Genotype | $\beta_{\text{CpG}}$ | <i>p</i> -value         |
|-------------|------------|----------|----------------------|-------------------------|
| rs3764647   | cg00135882 | AA       | 0.14                 | 0.311                   |
|             |            | GG/AG    | -0.49                | 0.005*                  |
| rs3764647   | cg22271697 | AA       | 0.14                 | 1.00×10 <sup>-4</sup> * |
|             |            | GG/AG    | -0.02                | 0.719                   |
| rs115550680 | cg06169110 | AA       | 0.06                 | 0.130                   |
|             |            | GG/AG    | -0.37                | 2.00×10 <sup>-4</sup> * |
| rs115550680 | cg17316918 | AA       | -0.05                | 0.238                   |
|             |            | GG/AG    | 0.33                 | 0.004*                  |

a. Outliers greater or less than 4 standard deviations were excluded: 4 values were excluded for cg00135882 (*n* = 490), 2 values were excluded for cg22271697 (*n* = 492) and cg17316918 (*n* = 492), and 1 value was excluded for cg06169110 (*n* = 493)

Model 4: General cognitive function~ SNP + CpG + SNP\*CpG + age at cognition measurement + age difference between methylation and cognition measurements + sex + educational status + *APOE* ε2 + *APOE* ε4 + smoking status + PC1-4 + familial relatedness (random effect)

\* *p*<0.05

**Table S8. Estimated effect of CpG<sup>a</sup> site on general cognitive function for given *ABCA7* SNP genotype group, after adjusting for SNP effect**

| SNP         | CpG site   | Genotype | $\beta_{\text{CpG}}$ | <i>p</i> -value         |
|-------------|------------|----------|----------------------|-------------------------|
| rs3764647   | cg22271697 | AA       | 0.15                 | $1.00 \times 10^{-4}$ * |
|             |            | GG/AG    | -0.02                | 0.571                   |
| rs115550680 | cg06169110 | AA       | 0.06                 | 0.120                   |
|             |            | GG/AG    | -0.37                | $2.00 \times 10^{-4}$ * |

a. Sensitivity analysis was conducted on identified SNP-by-CpG interactions from Table 2 whose CpGs were associated with their corresponding SNPs ( $P < 0.05$ ). The SNP effect was adjusted out of the CpG site effect, and the interaction analysis was conducted using the adjusted CpG value

Model 4: General cognitive function ~ SNP + CpG + SNP\*CpG + age at cognition measurement + age difference between methylation and cognition measurements + sex + educational status + *APOE*  $\epsilon 2$  + *APOE*  $\epsilon 4$  + smoking status + PC1-4 + familial relatedness (random effect)

\*  $p < 0.05$

**Table S9: Interaction between *ABCA7* sentinel SNPs and CpG sites on neurocognitive measurements (*n* = 494)**

| DSST                     | Main effects         |                 |                      |                 | Interaction                  |                 |
|--------------------------|----------------------|-----------------|----------------------|-----------------|------------------------------|-----------------|
|                          | $\beta_{\text{SNP}}$ | <i>p</i> -value | $\beta_{\text{CpG}}$ | <i>p</i> -value | $\beta_{\text{interaction}}$ | <i>p</i> -value |
| rs3764647 * cg00135882   | -0.35                | 0.679           | 0.68                 | 0.709           | -7.73                        | 0.005*          |
| rs3764647 * cg22271697   | -0.88                | 0.307           | 1.22                 | 0.008*          | -1.37                        | 0.047*          |
| rs115550680 * cg06169110 | -2.19                | 0.145           | 0.49                 | 0.340           | -4.24                        | 0.002*          |
| rs115550680 * cg17316918 | -0.07                | 0.959           | -0.54                | 0.319           | 3.38                         | 0.028*          |

| COWA-FAS                 | Main effects         |                 |                      |                 | Interaction                  |                 |
|--------------------------|----------------------|-----------------|----------------------|-----------------|------------------------------|-----------------|
|                          | $\beta_{\text{SNP}}$ | <i>p</i> -value | $\beta_{\text{CpG}}$ | <i>p</i> -value | $\beta_{\text{interaction}}$ | <i>p</i> -value |
| rs3764647 * cg00135882   | -0.20                | 0.828           | 2.85                 | 0.143           | -6.79                        | 0.023*          |
| rs3764647 * cg22271697   | -0.64                | 0.488           | 1.15                 | 0.021*          | -1.04                        | 0.158           |
| rs115550680 * cg06169110 | -1.67                | 0.300           | 0.01                 | 0.978           | -1.76                        | 0.219           |
| rs115550680 * cg17316918 | -0.59                | 0.684           | 0.07                 | 0.905           | 3.56                         | 0.030*          |

| RAVLT                    | Main effects         |                 |                      |                 | Interaction                  |                 |
|--------------------------|----------------------|-----------------|----------------------|-----------------|------------------------------|-----------------|
|                          | $\beta_{\text{SNP}}$ | <i>p</i> -value | $\beta_{\text{CpG}}$ | <i>p</i> -value | $\beta_{\text{interaction}}$ | <i>p</i> -value |
| rs3764647 * cg00135882   | 0.53                 | 0.055           | 0.19                 | 0.747           | -0.87                        | 0.346           |
| rs3764647 * cg22271697   | 0.50                 | 0.070           | 0.27                 | 0.075           | -0.48                        | 0.036*          |
| rs115550680 * cg06169110 | -0.32                | 0.511           | 0.07                 | 0.688           | -0.71                        | 0.107           |
| rs115550680 * cg17316918 | 0.09                 | 0.831           | -0.06                | 0.737           | 1.20                         | 0.017*          |

| SCWT                     | Main effects         |                 |                      |                         | Interaction                  |                 |
|--------------------------|----------------------|-----------------|----------------------|-------------------------|------------------------------|-----------------|
|                          | $\beta_{\text{SNP}}$ | <i>p</i> -value | $\beta_{\text{CpG}}$ | <i>p</i> -value         | $\beta_{\text{interaction}}$ | <i>p</i> -value |
| rs3764647 * cg00135882   | -0.55                | 0.498           | 2.92                 | 0.089                   | -7.68                        | 0.004*          |
| rs3764647 * cg22271697   | -1.06                | 0.187           | 1.68                 | 1.21×10 <sup>-4</sup> * | -1.79                        | 0.006*          |
| rs115550680 * cg06169110 | -2.70                | 0.058           | 0.93                 | 0.056                   | -3.29                        | 0.009*          |
| rs115550680 * cg17316918 | -1.23                | 0.340           | -0.89                | 0.083                   | 3.52                         | 0.016*          |

| TMTA                     | Main effects         |                 |                      |                 | Interaction                  |                 |
|--------------------------|----------------------|-----------------|----------------------|-----------------|------------------------------|-----------------|
|                          | $\beta_{\text{SNP}}$ | <i>p</i> -value | $\beta_{\text{CpG}}$ | <i>p</i> -value | $\beta_{\text{interaction}}$ | <i>p</i> -value |
| rs3764647 * cg00135882   | -0.03                | 0.333           | 0.05                 | 0.484           | -0.23                        | 0.043*          |
| rs3764647 * cg22271697   | -0.05                | 0.143           | 0.06                 | 0.002*          | -0.07                        | 0.020*          |
| rs115550680 * cg06169110 | -0.08                | 0.187           | 0.02                 | 0.423           | -0.15                        | 0.006*          |
| rs115550680 * cg17316918 | -0.01                | 0.903           | -0.02                | 0.272           | 0.11                         | 0.089           |

Key: DSST, Digit Symbol Substitution Task; COWA-FAS, Controlled Oral Word Association Test; RAVLT, Rey Auditory Verbal Learning Test; SCWT, Stroop Color-Word Test; TMTA, Trail Making Test A

Model 4: Cognitive test score ~ SNP + CpG + SNP\*CpG + age at cognition measurement + age difference between methylation and cognition measurements + sex + educational attainment + *APOE*  $\epsilon$ 2 + *APOE*  $\epsilon$ 4 + smoking status + PC1-4 + familial relatedness (random effect)

\* *p*<0.05

**Table S10. Interaction between *ABCA7* sentinel SNPs and CpG sites<sup>a</sup> on transcripts in the *ABCA7* gene region ( $p < 0.05$ ;  $n = 429$ )**

| Transcript      | SNP * CpG site Interaction | Main effects         |            |                        |            | Interaction                  |            |
|-----------------|----------------------------|----------------------|------------|------------------------|------------|------------------------------|------------|
|                 |                            | $\beta_{\text{SNP}}$ | $p$ -value | $\beta_{\text{CpG}}$   | $p$ -value | $\beta_{\text{interaction}}$ | $p$ -value |
| ENST00000525939 | rs115550680 * cg17316918   | 0.03                 | 0.428      | $-9.82 \times 10^{-3}$ | 0.493      | 0.09                         | 0.026*     |
| ENST00000531467 | rs3764647 * cg22271697     | 0.03                 | 0.085      | -0.012                 | 0.270      | 0.03                         | 0.046*     |

Model 5: Transcript  $\sim$  SNP + CpG + SNP\*CpG + age at gene expression measurement + age difference between methylation and gene expression measurements + sex + PC1-4 + familial relatedness (random effect)

a. Significant SNP-by-CpG interactions in Table 2

\*  $p < 0.05$ ; No associations are significant at FDR  $q < 0.1$

**Table S11. Estimated effect of CpG site on *ABCA7* transcripts for given *ABCA7* SNP genotype group (*n* = 429)**

| Transcript <sup>a</sup> | SNP                      | CpG site   | Genotype | $\beta_{\text{CpG}}$  | <i>p</i> -value |
|-------------------------|--------------------------|------------|----------|-----------------------|-----------------|
| ENST00000531467         | rs3764647 <sup>b</sup>   | cg22271697 | AA       | -0.01                 | 0.319           |
|                         |                          |            | GG/AG    | 0.02                  | 0.120           |
| ENST00000525939         | rs115550680 <sup>c</sup> | cg17316918 | AA       | $-7.6 \times 10^{-3}$ | 0.597           |
|                         |                          |            | GG/AG    | 0.07                  | 0.054           |

a. Transcripts associated with previously identified SNP-by-CpG interactions in Table S10

b. GG (*n* = 15) and AG (*n* = 156) groups were combined in the GG/AG group (*n* = 151)

c. GG (*n* = 3) and AG (*n* = 47) were combined in the GG/AG group (*n* = 50)

Model 5: Transcript ~ SNP + CpG + SNP\*CpG + age at gene expression measurement + age difference between methylation and gene expression measurements + sex + PC1-4 + familial relatedness (random effect)

No associations are significant at  $p < 0.05$

**Table S12. Association of SNPs<sup>a</sup> on transcripts in the *ABCA7* gene region ( $p < 0.05$ ;  $n = 429$ )**

| Transcript      | SNP         | $\beta_{\text{SNP}}$ | $p$ -value                 |
|-----------------|-------------|----------------------|----------------------------|
| ENST00000531467 | rs115550680 | -0.13                | $3.17 \times 10^{-5}^{**}$ |
| ENST00000527496 | rs115550680 | -0.13                | $2.14 \times 10^{-4}^{**}$ |
| ENST00000529442 | rs115550680 | -0.10                | $5.07 \times 10^{-4}^{**}$ |
| ENST00000524850 | rs115550680 | -0.09                | 0.001 <sup>**</sup>        |
| ENST00000526885 | rs115550680 | -0.06                | 0.008 <sup>**</sup>        |
| ENST00000532194 | rs115550680 | -0.07                | 0.009 <sup>**</sup>        |
| ENST00000433129 | rs115550680 | -0.06                | 0.012 <sup>**</sup>        |
| ENST00000525238 | rs115550680 | -0.06                | 0.012 <sup>**</sup>        |
| ENST00000263094 | rs115550680 | -0.05                | 0.015 <sup>**</sup>        |
| ENST00000530703 | rs115550680 | -0.06                | 0.024 <sup>**</sup>        |
| ENST00000435683 | rs115550680 | -0.05                | 0.026 <sup>**</sup>        |
| ENST00000530703 | rs3764647   | 0.03                 | 0.037 <sup>*</sup>         |

Model 5: Transcript  $\sim$  SNP + age at gene expression measurement + sex + PC1-4 + familial relatedness (random effect)

a. SNPs shown were previously significant in the SNP-by-CpG interactions in Table 2

\*  $p < 0.05$ , \*\* FDR  $q < 0.1$

**Table S13. Association of CpG sites<sup>a</sup> on transcripts in the *ABCA7* region ( $p < 0.05$ ;  $n = 429$ )**

| Transcript      | CpG Site   | $\beta_{\text{CpG}}$ | $p$ -value |
|-----------------|------------|----------------------|------------|
| ENST00000531478 | cg06169110 | 0.02                 | 0.008*     |
| ENST00000526885 | cg06169110 | 0.02                 | 0.037*     |

Model 5: Transcript  $\sim$  CpG + age + age difference between methylation measurement and gene expression measurement + sex + PC1-4 + familial relatedness (random effect)

a. CpG sites shown were previously significant in the SNP-by-CpG interactions in Table 2

\* $p < 0.05$ ; No associations are significant at FDR  $q < 0.1$
